# Supplementary material for: Unveiling transient protein-protein interactions that modulate inhibition of alpha-synuclein aggregation by beta-synuclein, a pre-synaptic protein that co-localizes with alpha-synuclein
Source: PubMed Central journal article supplement (PMC4609965; doi:10.1038/srep15164), 2015-10-19
Supplement: srep15164-s1.pdf [file srep15164-s1.pdf]

## Supplementary information

Unveiling transient protein-protein interactions that modulate inhibition of alpha-synuclein aggregation by beta-synuclein, a pre-synaptic protein that co-localizes with alpha-synuclein.

Maria K. Janowska, Kuen-Phon Wu and Jean Baum

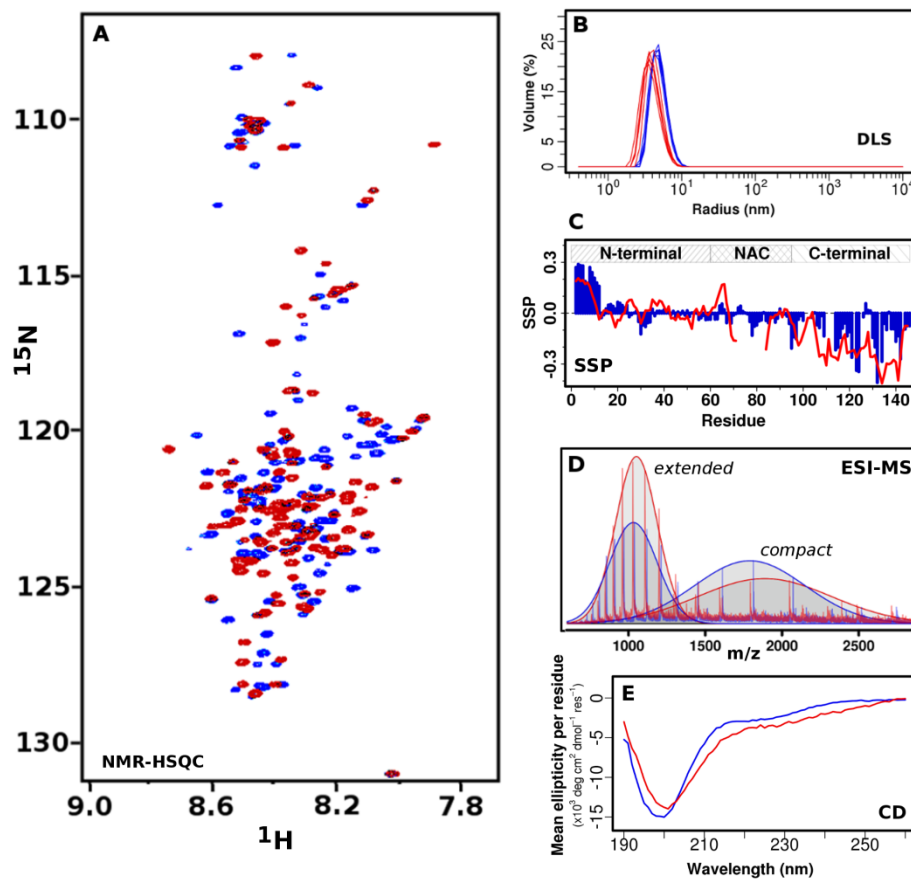

**Supplementary Fig.1.** Comparison of monomer conformational features of acetylated  $\alpha$ S and acetylated  $\beta$ S. (A)  $^1\text{H}$ - $^{15}\text{N}$ -HSQC spectra of  $\alpha$ S and  $\beta$ S at  $15^\circ\text{C}$  and pH 6. (B) DLS spectra showing that  $\alpha$ S and  $\beta$ S both have hydrodynamic radii in the range of 5-6 nm. No oligomers were detected and proteins are monomeric (>99%). (C) SSP indicates that N-terminal acetylation induces transient N-terminal helix formation in  $\beta$ S that is similar to acetylated  $\alpha$ S; the transient helix in  $\beta$ S spans residues 1 to 12. (D) ESI-

MS shows that both  $\alpha$ S and  $\beta$ S are 100% acetylated and that both proteins can exist in compact and extended conformations (indicated by fitting two Gaussians).  $\alpha$ S has a 59% compact/ 41% extended ratio while  $\beta$ S has a 46% compact/ 54% extended ratio. (E) Circular Dichroism spectra indicate that both  $\alpha$ S and  $\beta$ S have very similar profiles consistent with unfolded nature of the protein.

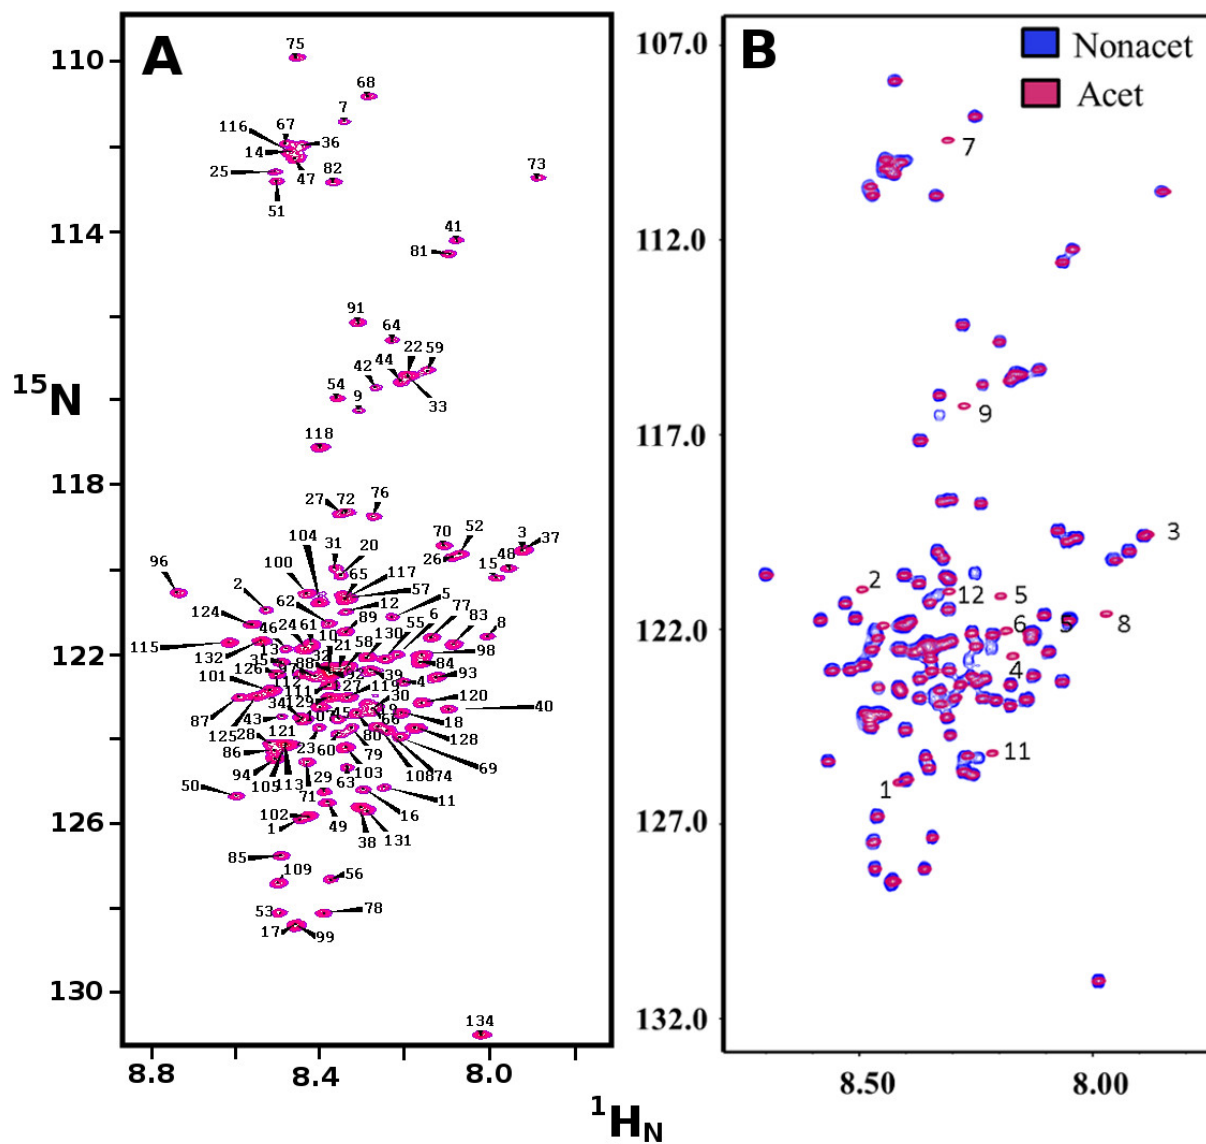

**Supplementary Figure 2.** (A)  $^1\text{H}$ - $^{15}\text{N}$  HSQC spectrum of acetylated  $\beta$ S. Sequence-specific resonance assignments are indicated with labels. (B)  $^1\text{H}$ - $^{15}\text{N}$  HSQC overlay of non-acetylated (blue) and acetylated (pink)  $\beta$ S. Changes in positions of the peaks due to acetylation arise for the first 12 residues, and are labeled on the spectrum with the corresponding residue number.

## Position of MTSL spin labels

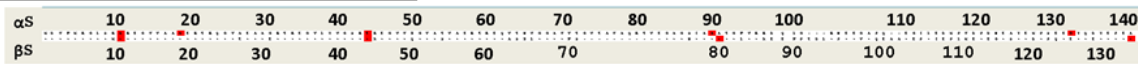

### Experimental design

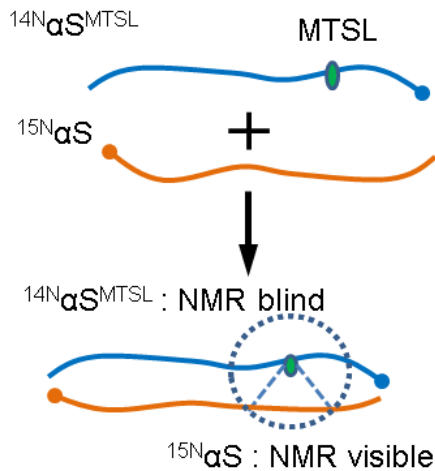

### Data representation

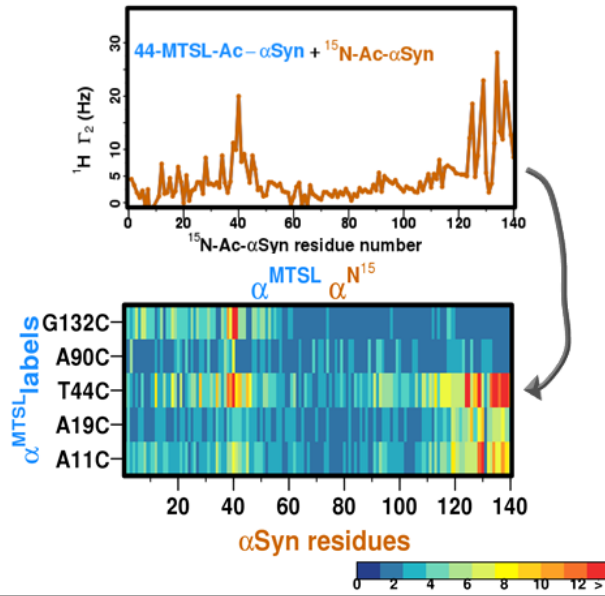

**Supplementary Fig. 3.** Schematic of experimental design for NMR PRE experiments. (A) 4 spin labels were introduced on each of the chains of the proteins, indicated by red box in the sequence of the protein. A->C and T->C mutants were selected in order to minimize effects of mutations. (B) Two different species are mixed in a 1:1 ratio: the NMR visible ( $^{15}\text{N}$  protein) and the NMR invisible MTSL spin labeled  $^{14}\text{N}$ -protein. If the spin label is in the proximity to the  $^{15}\text{N}$  labeled chain, the relaxation rates are increased (C) Example of the data representation. The top plot shows the relaxation enhancement rates (PRE rate -  $\Gamma$ ) detected on the NMR visible chain ( $^{15}\text{N}$ ). The lower plot shows the interactions in a pseudo contact map representation with the four spin labeled positions mapped against the  $^{15}\text{N}$  residues in the protein. The contact map is represented as a heat map with the color index shown in the inset.

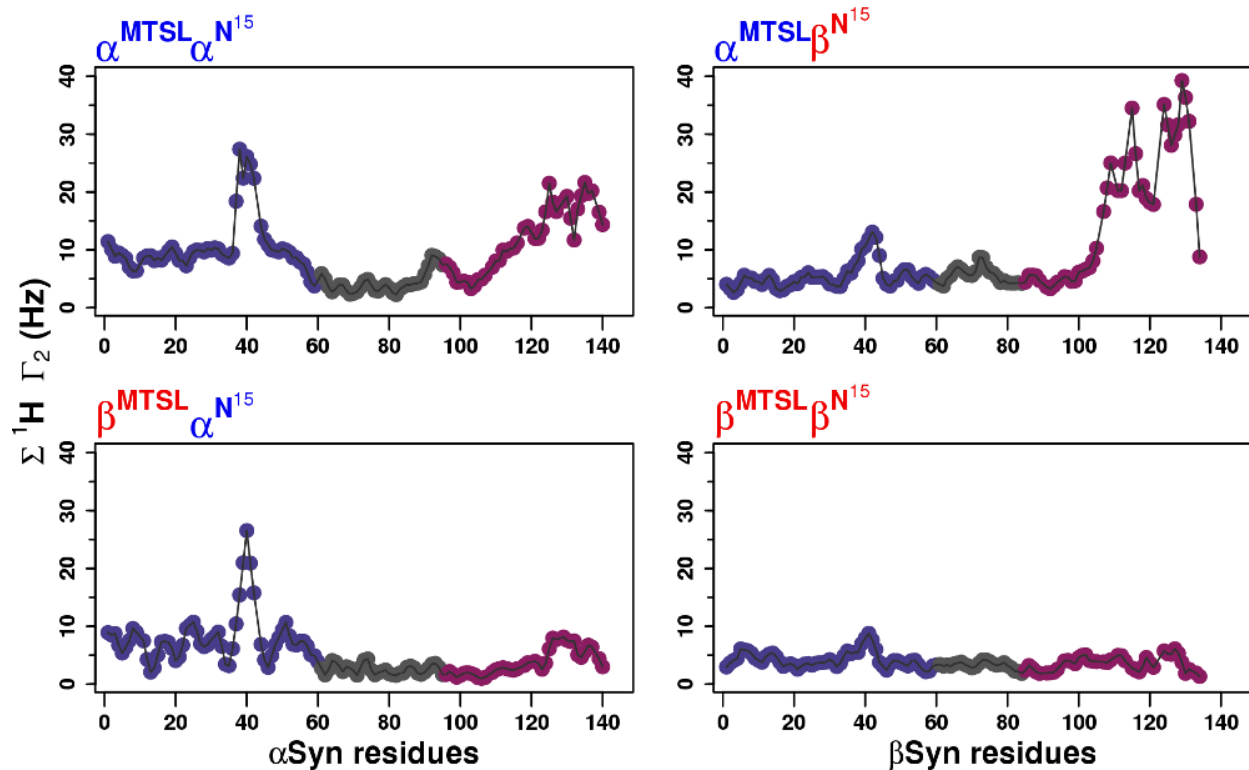

**Supplementary Fig.4.** Interactive regions of dimeric complexes. Summation of the PRE rates as a function of residue indicate that (A) in  $\alpha$ S homo-dimeric complexes interactions occur at the N and C-termini. (B) In  $\beta$ S/ $\alpha$ S hetero-dimer complexes, interactions with  $\alpha$ S are mediated primarily through the C-terminus. (C) In the  $\alpha$ S/ $\beta$ S hetero-dimer interactions are mediated by the  $\alpha$ S N-terminus. (D) in  $\beta$ S homo-dimer there are essentially no interactions. In all plots N-terminus is plotted violet, NAC is grey and C-terminus is pink.

Supplementary Table 1.  $K_D$  values for  $\alpha$ S/ $\alpha$ S homodimer as fitted  $\chi$ -squared statistic using equation (1).

| <b><math>\alpha/\alpha</math> homo-dimer</b> |                                             |                                                  |                                                 |
|----------------------------------------------|---------------------------------------------|--------------------------------------------------|-------------------------------------------------|
| <b>residue number</b>                        | <b><math>K_D</math> [<math>\mu</math>M]</b> | <b><math>\Gamma_2^{\text{bound}}</math> [Hz]</b> | <b><math>\Gamma_2^{\text{free}}</math> [Hz]</b> |
| 119                                          | $151.5 \pm 22.6$                            | $24.8 \pm 1.4$                                   | $0.1 \pm 0.4$                                   |

|     |                |            |          |
|-----|----------------|------------|----------|
| 124 | 269.7± 115.3   | 26.6± 5.5  | -0.1±0.9 |
| 125 | 397.8±143.7    | 56± 11.5   | -0.6±1.1 |
| 126 | 87.1 ± 59.4    | 33.9± 6.9  | -0.4±3.5 |
| 129 | 157.4±53.2     | 41.2± 5.4  | -0.2±1.7 |
| 130 | 719.7±216.1    | 128.1±26.1 | 0.4±1.1  |
| 135 | 241.2± 45.4    | 29.2±2.5   | 0.1±0.5  |
| 137 | 1219.8+/-858.6 | 133.9±72.7 | 0.9±1.2  |
| 139 | 934.3±532.1    | 75.5±31.2  | 0.6±0.8  |

Supplementary Table 2.  $K_D$  values for  $\alpha/\beta$ S hetero-dimer as fitted using  $\chi$ -squared statistic.

| <b><math>\alpha/\beta</math> hetero-dimer</b> |                                             |                                                  |                                                 |
|-----------------------------------------------|---------------------------------------------|--------------------------------------------------|-------------------------------------------------|
| <b>residue number</b>                         | <b><math>K_D</math> [<math>\mu</math>M]</b> | <b><math>\Gamma_2^{\text{bound}}</math> [Hz]</b> | <b><math>\Gamma_2^{\text{free}}</math> [Hz]</b> |
| 111                                           | 36.8±34.2                                   | 22.5±3.5                                         | -0.2±3.6                                        |
| 112                                           | 107.8±39.4                                  | 22.6±2.4                                         | -0.3±1.4                                        |
| 115                                           | 348.8±111.1                                 | 60.7±9.1                                         | 0±1.7                                           |
| 116                                           | 84.8±29.4                                   | 19.2±1.7                                         | -0.2±1.2                                        |
| 118                                           | 141.3±34                                    | 23.4±1.8                                         | -0.3±0.9                                        |
| 119                                           | 140.5±88.4                                  | 35.3±7.3                                         | -0.9±3.5                                        |
| 120                                           | 338.3±166.7                                 | 55.3±12.7                                        | 0.1±2.4                                         |
| 121                                           | 187±56                                      | 40.1±4.4                                         | -0.5±1.6                                        |
| 124                                           | 54.7±31.5                                   | 29.3±3.6                                         | -0.2±3.1                                        |
| 125                                           | 98.3±31.9                                   | 28±2.5                                           | -0.3±1.6                                        |

|     |            |          |          |
|-----|------------|----------|----------|
| 126 | 105.3±21.2 | 29.9±1.7 | -0.2±1   |
| 127 | 36.8±34.2  | 22.5±3.5 | -0.2±3.6 |
| 128 | 90.7±56.2  | 38.2±6.3 | 0±4.2    |
| 129 | 133.5±63.6 | 40.7±6.2 | -0.7±3.1 |
| 131 | 80.7±21.8  | 32.3±2.2 | 0.1±1.6  |
| 133 | 142.6±20.1 | 31.2±1.4 | -0.2±0.7 |

## Supplementary Methods

1. NMR experiments. Assignments on  $\beta$ S and  $\alpha$ S were performed using the protocol described elsewhere.<sup>1</sup> Backbone atom assignments were established in acetylated  $\beta$ S for all residues except for the prolines. Acetylation of the protein facilitated assignment of the first few residues, which are highly flexible in the non-acetylated form of the protein. Experiments were performed on 350 $\mu$ M  $^{15}$ N and  $^{13}$ C labeled sample with 10%D<sub>2</sub>O in 10mM MES buffer pH 6 with 100mM NaCl. Secondary structure propensities were extracted using the SSP program by Julie Forman-Kay.<sup>2</sup> If the values are positive then this region has helical propensities, if the values are negative then the beta-sheet propensities are more pronounced.

2. Electrospray ionization mass spectroscopy (ESI-MS). ESI-MS experiments were performed in order to determine the population distributions of the monomeric ensembles of  $\alpha$ S and  $\beta$ S using methods described previously.<sup>3</sup> Samples were prepared in 10mM Ammonium Acetate, pH 6 in final concentration 50 $\mu$ M, by using 100 kDa and 3kDa filters.

3. Dynamic light scattering (DLS). DLS measurements were carried out using a Zetasizer Nano ZS (Malvern Instruments, UK). Data was collected using a 3 mW He-Ne laser light at a 633 nm wavelength back scattered light at an angle of 173°. Autocorrelation functions were determined from 6 correlation

functions, with an acquisition time of 10 s for one correlation function. The sample concentration was 200uM.

4.Negative straining TEM. Fibrils were visualized using a JEM-100CXII manufactured by JEOL. Negative staining TEM was performed using a single droplet procedure<sup>4</sup> at ambient temperature. Micrographs were recorded at a magnification of 100,000. All of the chemicals are purchased from Sigma.

- 1 Kang, L. J., Wu, K. P., Vendruscolo, M. & Baum, J. The A53T Mutation is Key in Defining the Differences in the Aggregation Kinetics of Human and Mouse alpha-Synuclein. *J Am Chem Soc* **133**, 13465-13470, doi:Doi 10.1021/Ja203979j (2011).
- 2 Marsh, J. A., Singh, V. K., Jia, Z. C. & Forman-Kay, J. D. Sensitivity of secondary structure propensities to sequence differences between alpha- and gamma-synuclein: Implications for fibrillation. *Protein Sci* **15**, 2795-2804, doi:Doi 10.1110/Ps.062465306 (2006).
- 3 Moriarty, G. M., Minetti, C. A., Remeta, D. P. & Baum, J. A revised picture of the Cu(II)-alpha-synuclein complex: the role of N-terminal acetylation. *Biochemistry-Us* **53**, 2815-2817, doi:10.1021/bi5003025 (2014).
- 4 Horne, R. W. & Cockayne, D. J. H. Negative Staining. *Micron Microsc Acta* **22**, 319-319, doi:Doi 10.1016/0739-6260(91)90050-A (1991).
